# Supplementary material
Source: PubMed Central journal article supplement (PMC5541253)
Supplement: NIHMS881709-supplement-2.pdf [file NIHMS881709-supplement-2.pdf]

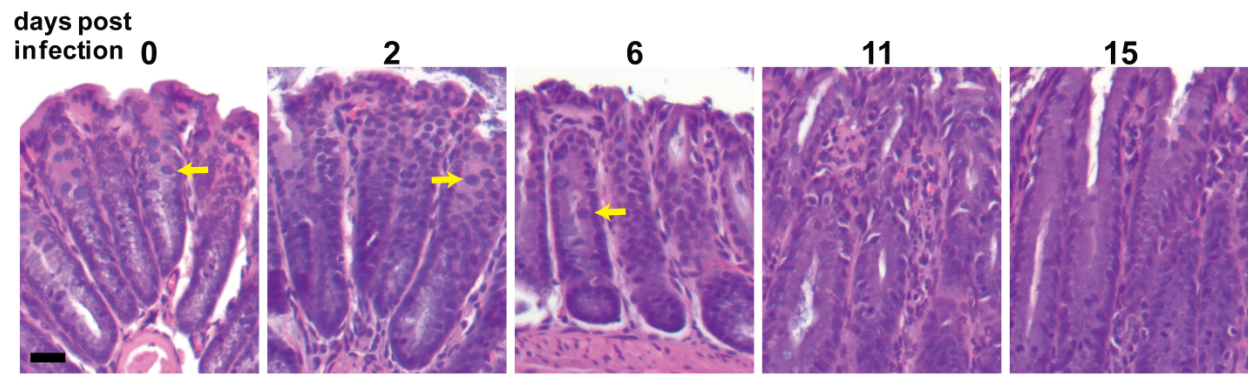

**Figure S1** Hematoxylin and eosin-stained sections of wildtype mice before and at 2, 6, 11, and 15 days after *C. rodentium* infection. Related to Figure 1. Goblet cells (arrows) are progressively depleted and difficult to detect at days 11 and 15. Bar = 50  $\mu$ m.

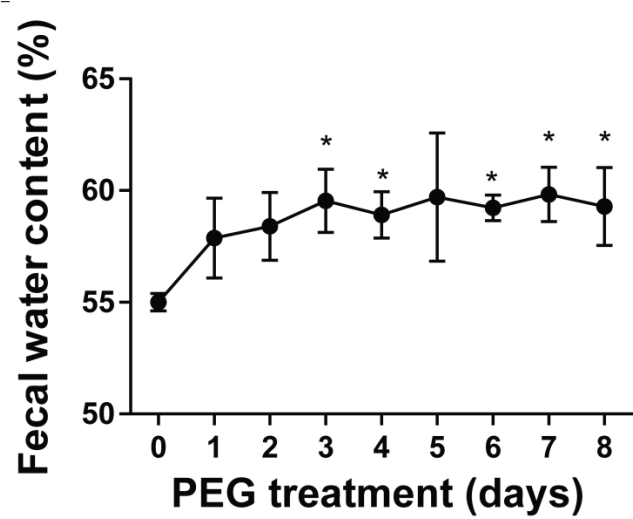

**Figure S2** Wildtype (WT) mice received normal water or water containing 2% polyethylene glycol (PEG). Related to Figures 6 and 7. Fecal water content is shown.

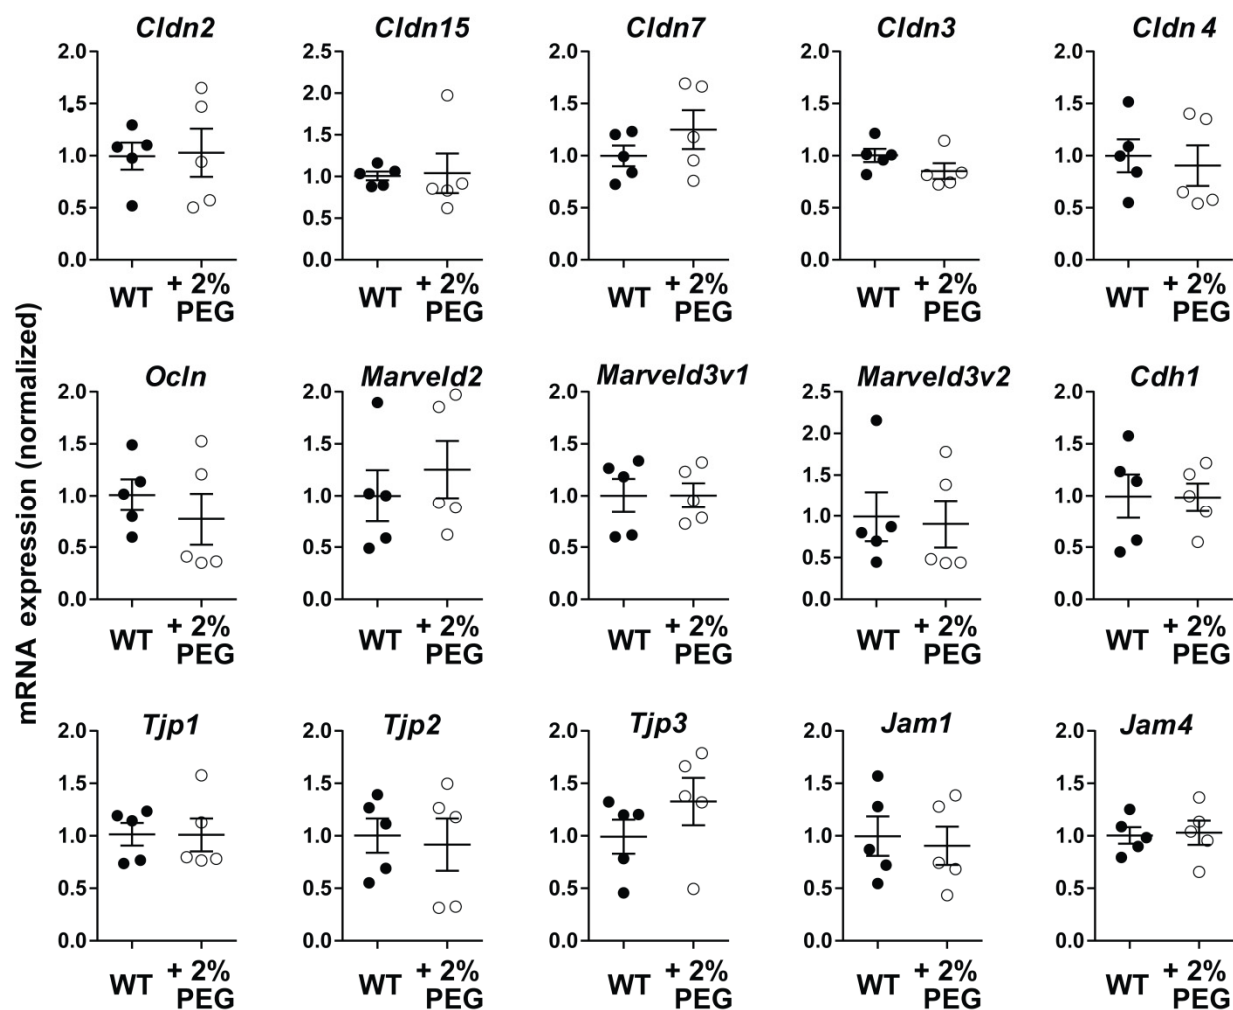

**Figure S3** Colonic epithelia were isolated from wildtype (WT) mice or wildtype mice that received water with 2% polyethylene glycol (PEG) for 7 days. Related to Figures 6 and 7. Tight junction protein transcript numbers, after normalization keratin 8 transcripts and WT mice without PEG, are shown. No changes were significant.

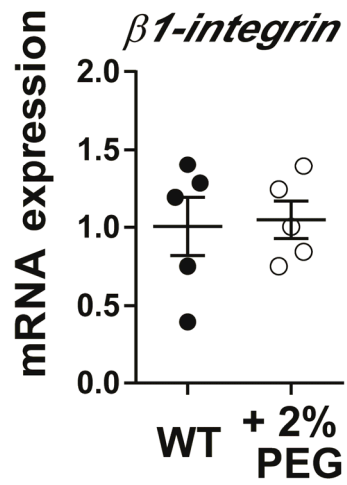

**Figure S4** Colonic epithelia were isolated from wildtype (WT) mice or wildtype mice that received water with 2% polyethylene glycol (PEG) for 7 days. Related to Figures 6 and 7. Numbers of  $\beta_1$ -integrin transcripts, after normalization keratin 8 transcripts and WT mice without PEG, are shown. Changes were not significant. See also Figures 6 and 7.

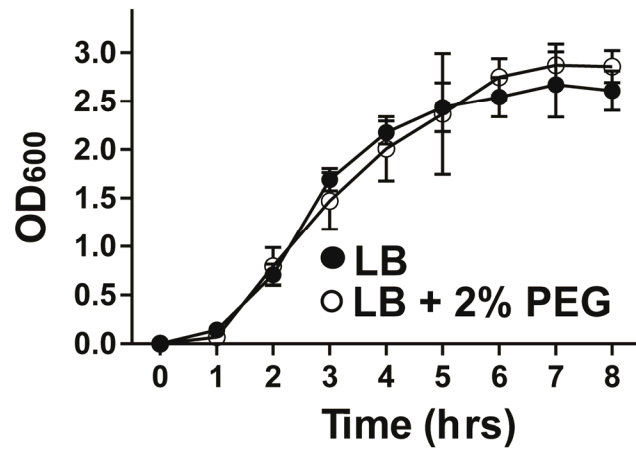

**Figure S5** *C. rodentium* from a stationary phase culture were diluted 1:100 into fresh LB medium that did not or did contain 2% polyethylene glycol (PEG). Related to Figure 6. Growth through lag, log, and stationary phase was followed as OD<sub>600</sub> for 8 hrs.

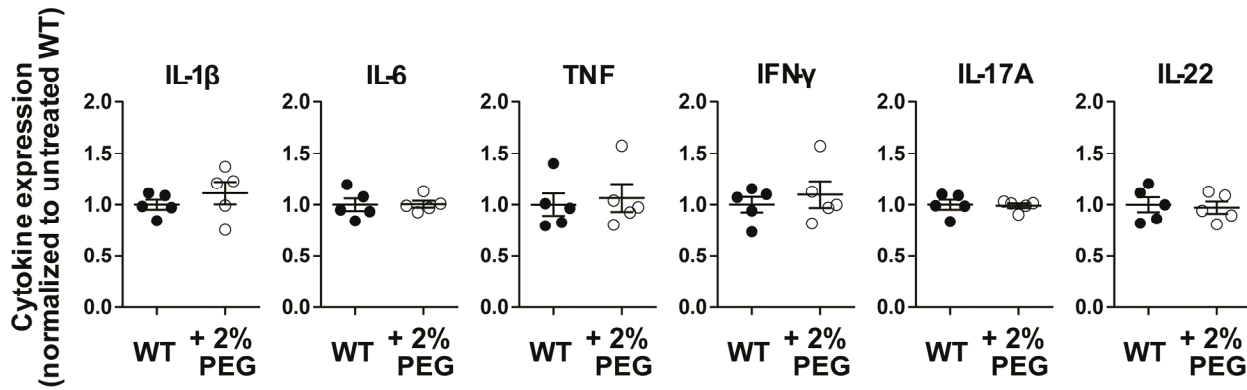

**Figure S6** Colonic mucosal cytokine content was assessed by ELISA in in wildtype (WT) mice or wildtype mice that received water with 2% polyethylene glycol (PEG) for 7 days. Related to Figure 6. Data are normalized to wildtype mice receiving water without PEG. No changes were significant.

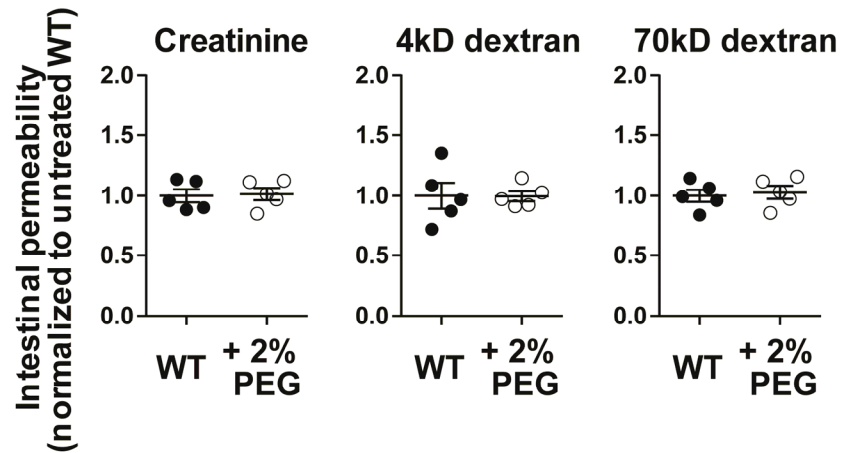

**Figure S7** Intestinal permeability to creatinine, 4kD dextran, and 70 kD dextran were assessed in wildtype (WT) mice or wildtype mice that received water with 2% polyethylene glycol (PEG) for 7 days. Related to Figure 7. Data are normalized to wildtype mice receiving water without PEG. No changes were significant.

**Supplemental Table I.** PCR primers used. Related to STAR Methods.

| <b>Gene (mouse)</b>                 | <b>Forward primer (5' – 3')</b> | <b>Reverse primer (5' – 3')</b> |
|-------------------------------------|---------------------------------|---------------------------------|
| <i>Itgb1</i> ( $\beta_1$ -integrin) | AGTGCTCCCACTTCAATCTCACCA        | TCTCCTTGCAATGGGTACAGGAT         |
| <i>Cldn2</i>                        | GGCTGTTAGGCACATCCAT             | TGGCACCAACATAGGAACTC            |
| <i>Cldn3</i>                        | AAGCCGAATGGACAAAGAA             | CTGGCAAGTAGCTGCAGTG             |
| <i>Cldn4</i>                        | CGCTACTCTTGCCATTACG             | ACTCAGCACACCATGACTTG            |
| <i>Cldn7</i>                        | AGGGTCTGCTCTGGTCCTT             | GTACGCAGCTTTGCTTTCA             |
| <i>Cldn8</i>                        | GCCGGAATCATCTTCTTCAT            | CATCCACCAGTGGGTTGTAG            |
| <i>Cldn15</i>                       | CAGCTTCGGTAAATATGCCA            | CAGTGGGACAAGAAATGGTG            |
| <i>Jam1</i> ( <i>F11r</i> )         | ACCCTCCCTCCTTTCCTTAC            | CTAGGACTCTTGCCCAATCC            |
| <i>Jam4</i>                         | GGACTCAGAGGCTCACTTCA            | AGACTCAGCACCACCATTTG            |
| <i>Tjp1</i> (ZO-1)                  | AGGACACCAAAGCATGTGAG            | GGCATTCTGCTGGTTACA              |
| <i>Tjp2</i> (ZO-2)                  | ATGGGAGCAGTACACCGTGA            | TGACCACCCTGTCATTTTCTTG          |
| <i>Tjp3</i> (ZO-3)                  | TCGGCATAGCTGTCTCTGGA            | GTTGGCTGTTTTGGTGCAGG            |
| <i>Ocln</i>                         | GCTGTGATGTGTGTGAGCTG            | GACGGTCTACCTGGAGGAAC            |
| <i>MarvelD3</i> (variant 1)         | GGGCTTCGGAAAGATACGTG            | CACCGTCAAAGCCACTATAAG           |
| <i>MarvelD3</i> (variant 2)         | CTCCTGGATTGCCACAAATG            | GTGCCCTCAAAGGTGAGTA             |
| <i>MarvelD2</i> (tricellulin)       | CTCGGAGACATCGGGAGTTC            | CCTGATCCCTCTGTCGATCACT          |
| <i>Cdh1</i> (E-cadherin)            | TCCTTGTTCCGGCTATGTGTC           | GGCATGCACCTAAGAATCAG            |
| <i>Krt8</i>                         | AAGGTGTGGAAAGAGCTAGCC           | ATAGACGTTGACTGCACGCACT          |
